# Supplementary material
Source: PubMed Central journal article supplement (PMC2648152)

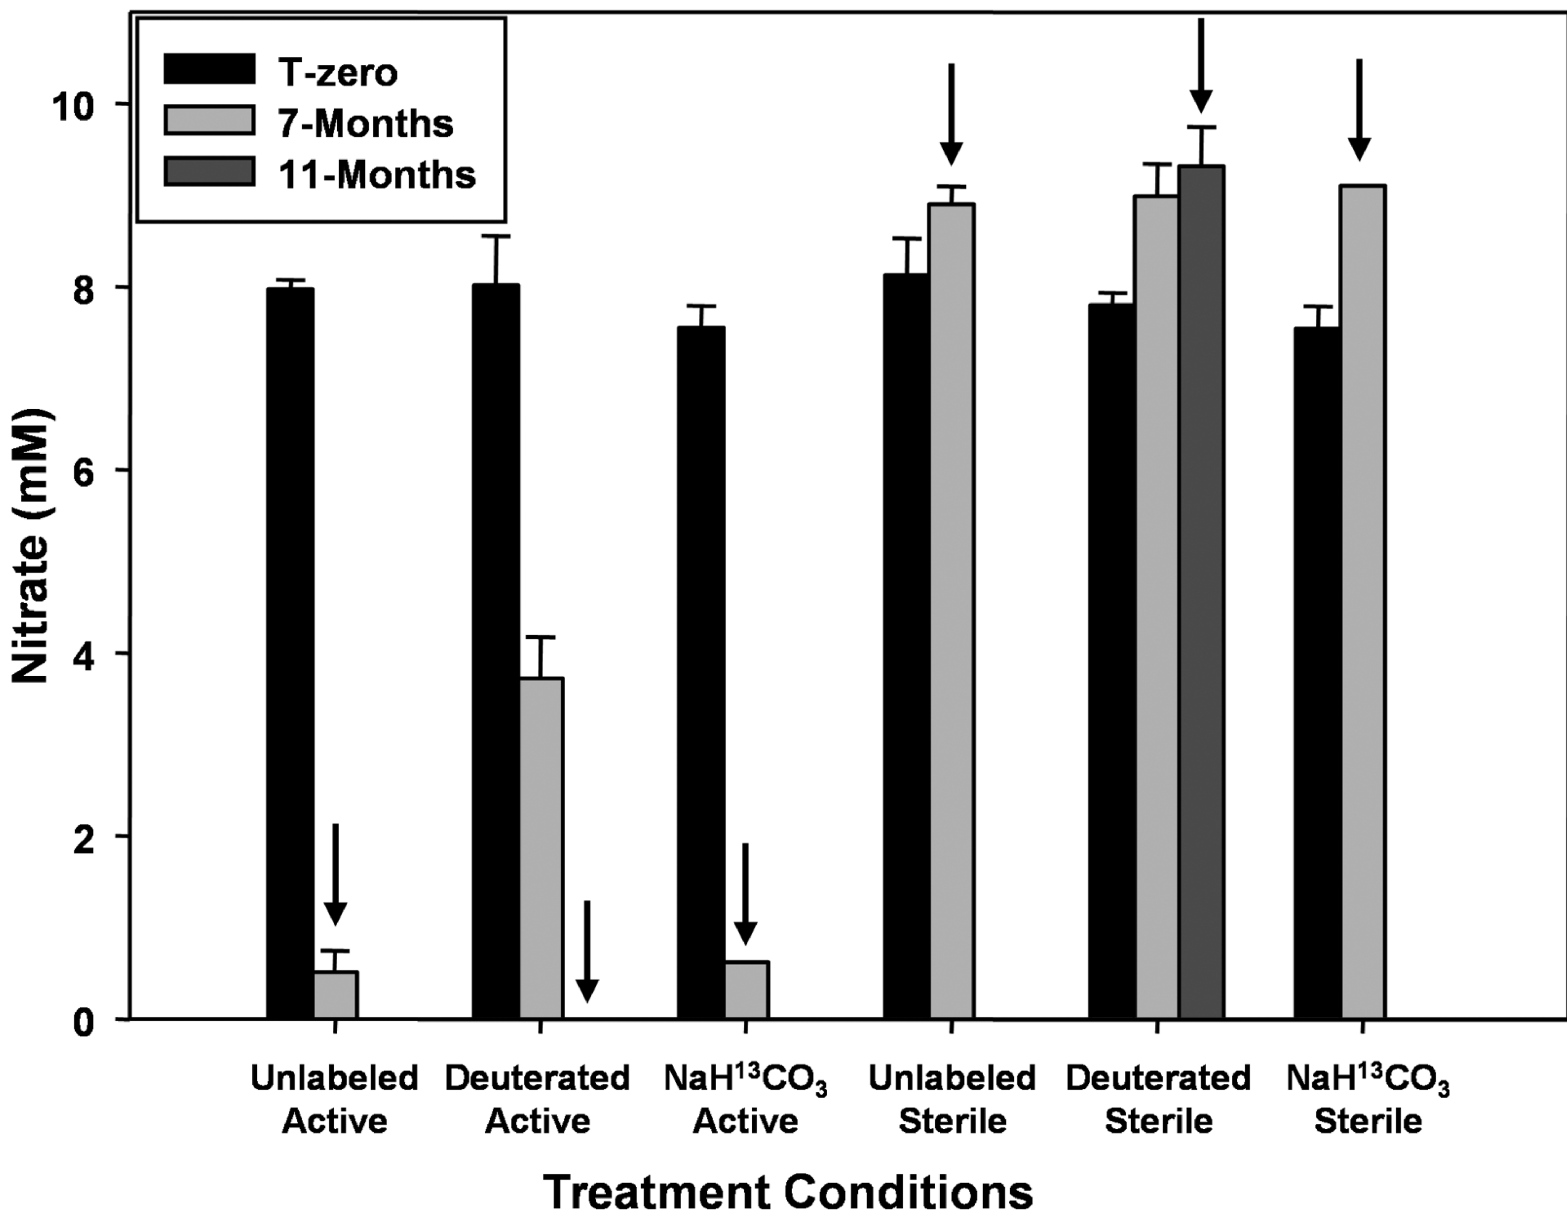

Supplement: supp_75_5_1339__2.pdf [file supp_75_5_1339__2.pdf]
